# Supplementary material for: Interfacial electronic properties and tunable band offset in graphyne/MoSe2 heterostructure with high carrier mobility
Source: Royal Society of Chemistry journal article supplement (doi:10.1039/d3nj00067b), 2023-01-01
Supplement: d3nj00067b1.pdf [file d3nj00067b1.pdf]

## Supporting Information

### Interfacial electronic properties and tunable band offset in graphene/MoSe<sub>2</sub> heterostructure with high carrier mobility

Siyu Zhang<sup>1</sup>, Jiangni Yun<sup>1,\*</sup>, Liru Zeng<sup>1</sup>, Linwei Yao<sup>1</sup>, Zhisong Bi<sup>1</sup>, Chunwei Mai<sup>1</sup>, Peng Kang<sup>2</sup>,  
Junfeng Yan<sup>1</sup>, Zhiyong Zhang<sup>1</sup>

<sup>1</sup>School of Information Science and Technology, Northwest University, Xi'an, 710127, China

<sup>2</sup>Department of Physics, McGill University, Montreal, Quebec H3A 2T8, Canada

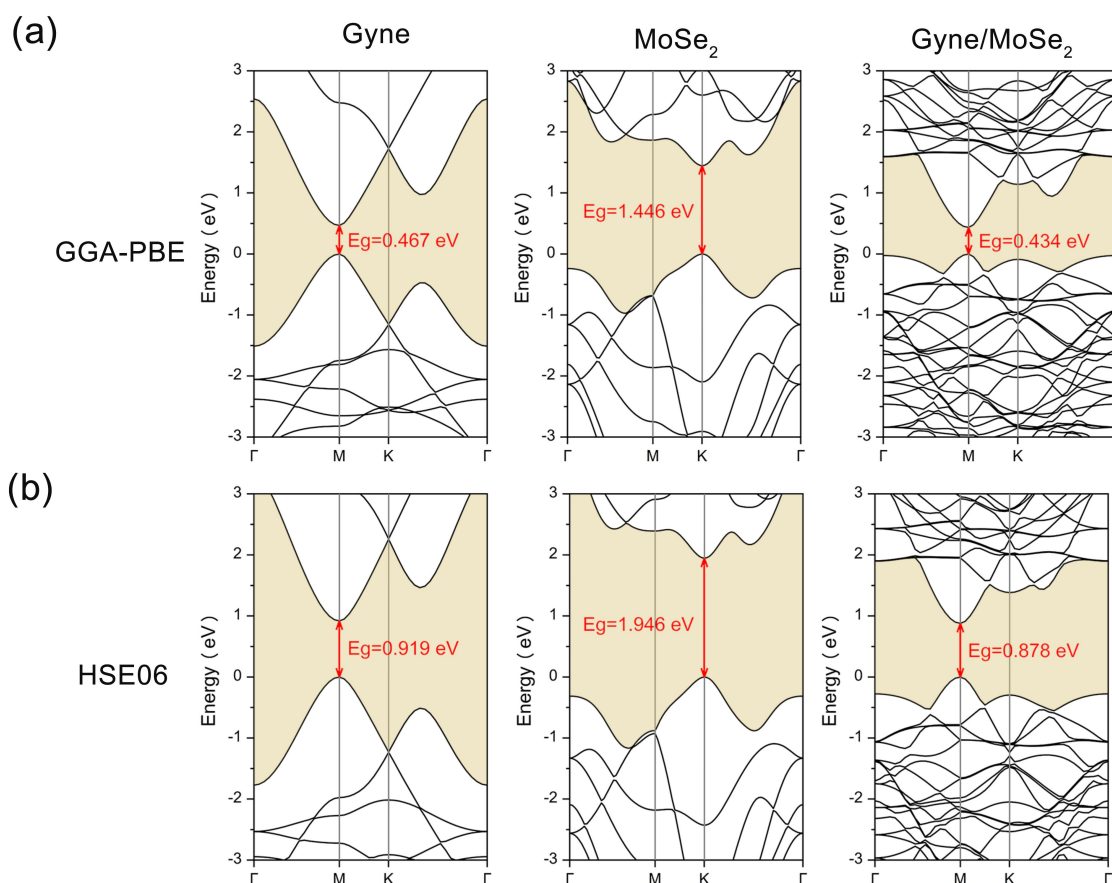

**Fig. S1.** Band structures of the Gyne ML, MoSe<sub>2</sub> ML and Gyne/MoSe<sub>2</sub> heterostructure based on (a) PBE and (b) HSE06 method. Here, the Fermi levels are set to zero.

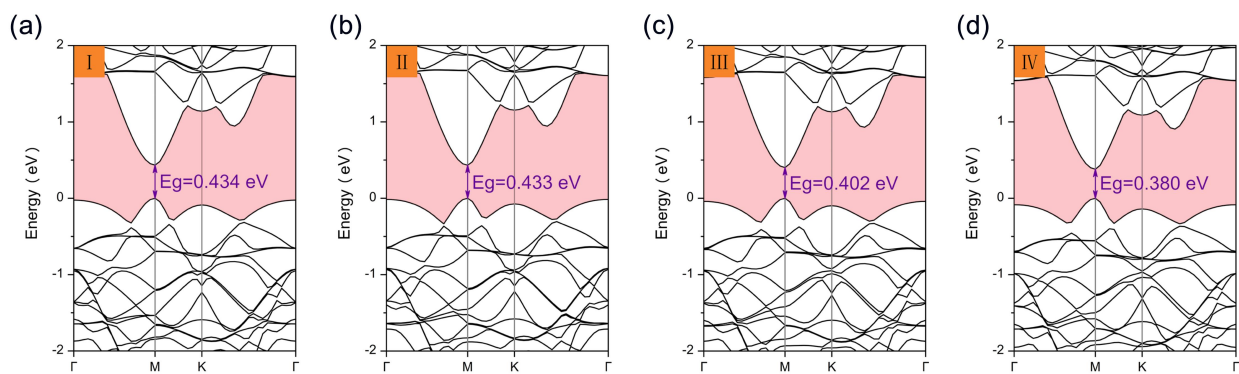

**Fig .S2.** The band structures of four stackings of Gyne/MoSe<sub>2</sub> heterostructure.

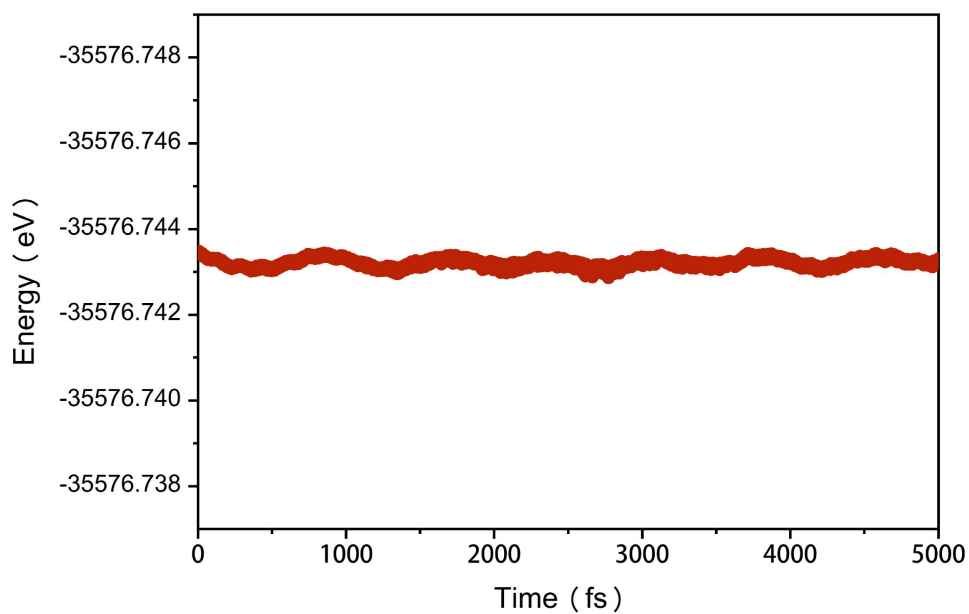

**Fig. S3.** The calculated AIMD snapshots of the Gyne/MoSe<sub>2</sub> heterostructure at 300K with 5ps.

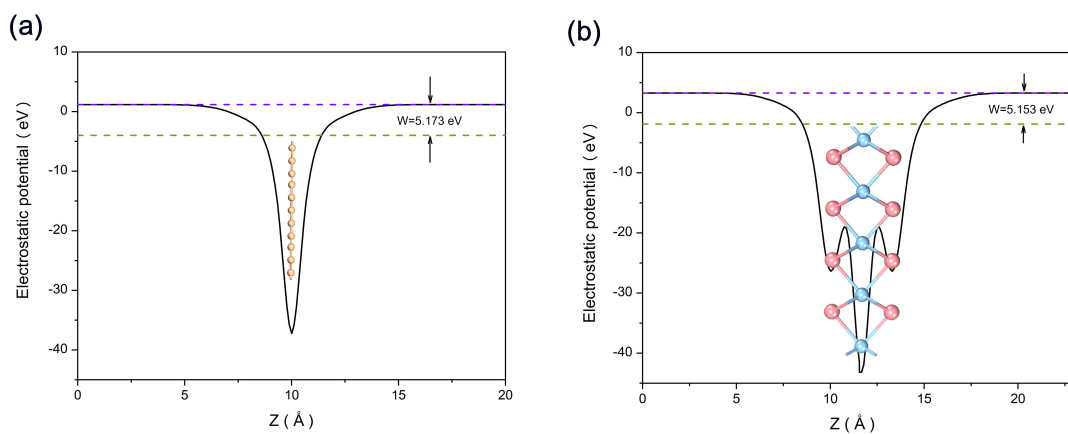

**Fig .S4.** The work functions of (a) Gyne and (b) MoSe<sub>2</sub> monolayer.

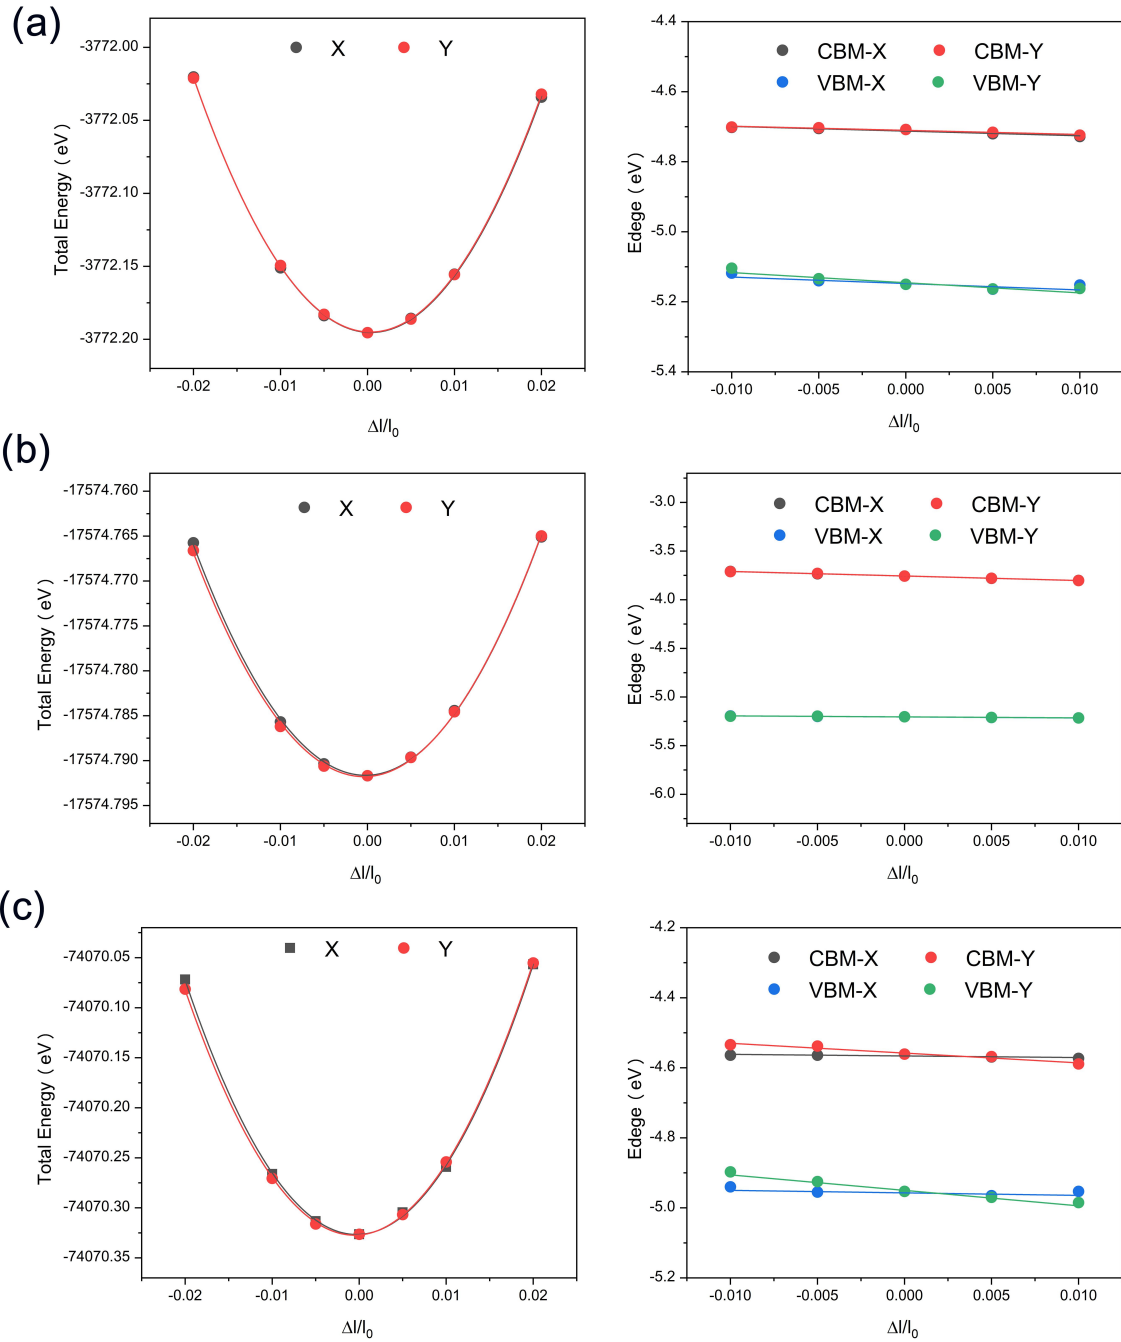

**Fig. S5.** Elastic modulus (left) and deformation potential constant (right) evaluation for (a) Gyne ML, (b) MoSe<sub>2</sub> ML, and (c) Gyne/MoSe<sub>2</sub> heterostructure.

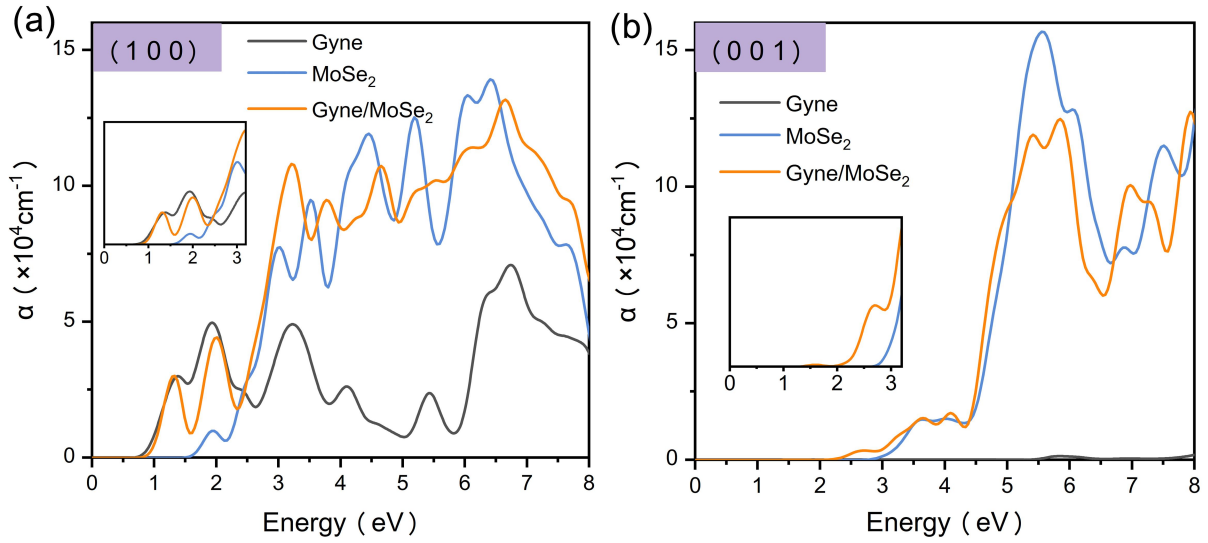

**Fig. S6.** The optical absorption of Gyne ML, MoSe<sub>2</sub> ML, and Gyne/MoSe<sub>2</sub> vdW heterostructure in the (a) (100) and (b) (001) directions under HSE06 function, and the insets are the optical absorption in micro-region.

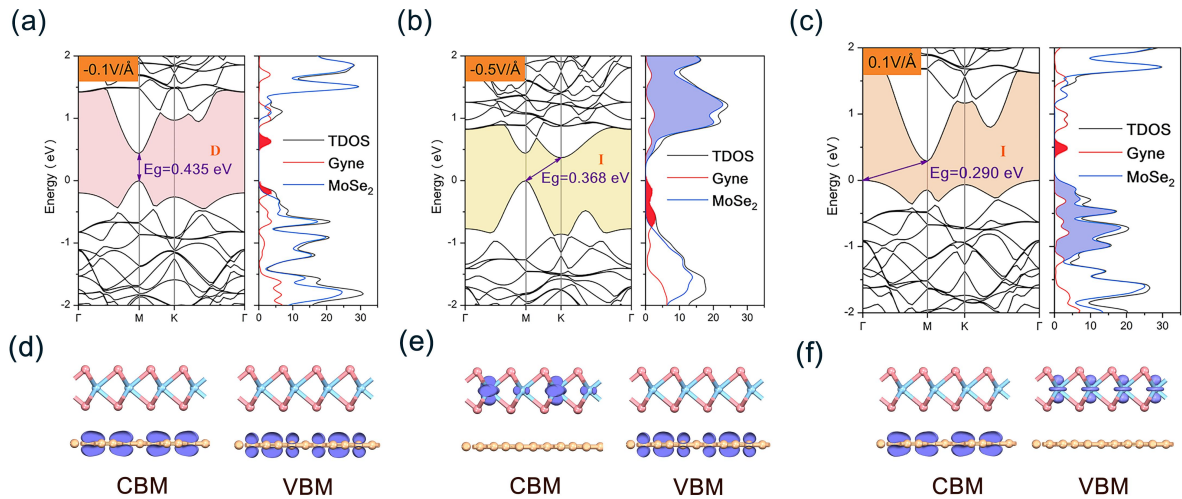

**Fig. S7.** Band structures, density of states and side views of band decomposed charge density CBM and VBM of the Gyne/MoSe<sub>2</sub> heterostructure under the external electric field of (a)-0.1V/Å, (b)-0.5V/Å and (c) 0.1V/Å. The Fermi levels are set to zero.

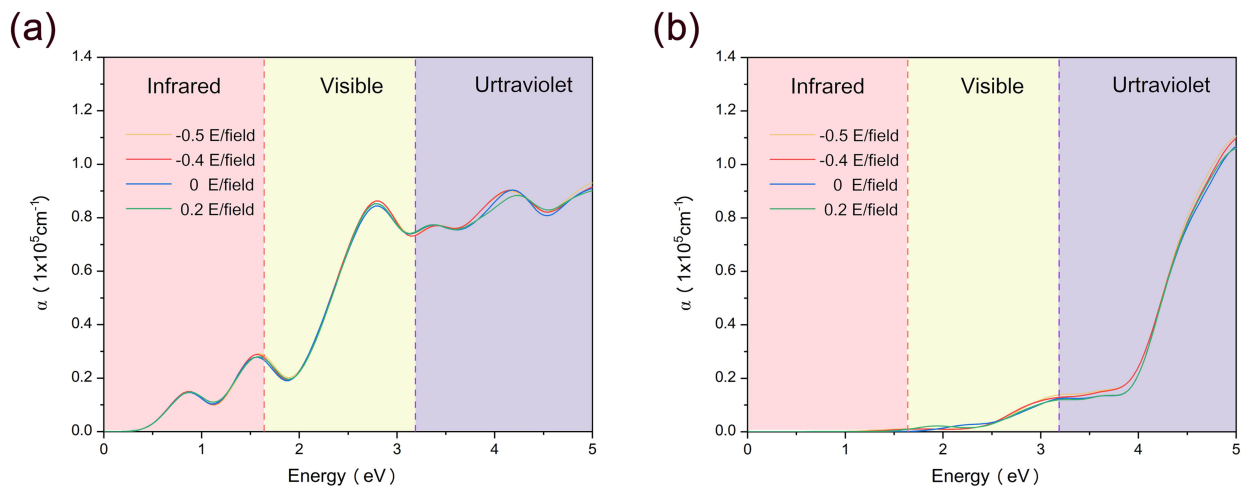

**Fig .S8.** The optical absorption Gyne/MoSe<sub>2</sub> heterostructure under the external electric field in the (100) (a) and (001) (b) directions.
